# Supplementary material for: A Novel Strategy to Enhance the Photostability of InP/ZnSe/ZnS Quantum Dots with Zr Doping
Source: MDPI journal article supplement (doi:10.3390/nano12224044), 2022-11-17
Supplement: s1 [file s1]

# A novel strategy to enhance the photostability of InP/ZnSe/ZnS Quantum Dots with Zr doping

Xunqiang Cheng <sup>1</sup>, Mingming Liu <sup>1</sup>, Qinggang Zhang <sup>1</sup>, Mengda He <sup>1</sup>, Xinrong Liao <sup>1</sup>, Qun Wan <sup>1</sup>, Wenji Zhan <sup>1</sup>, Long Kong <sup>1,\*</sup>, and Liang Li <sup>1,2</sup>

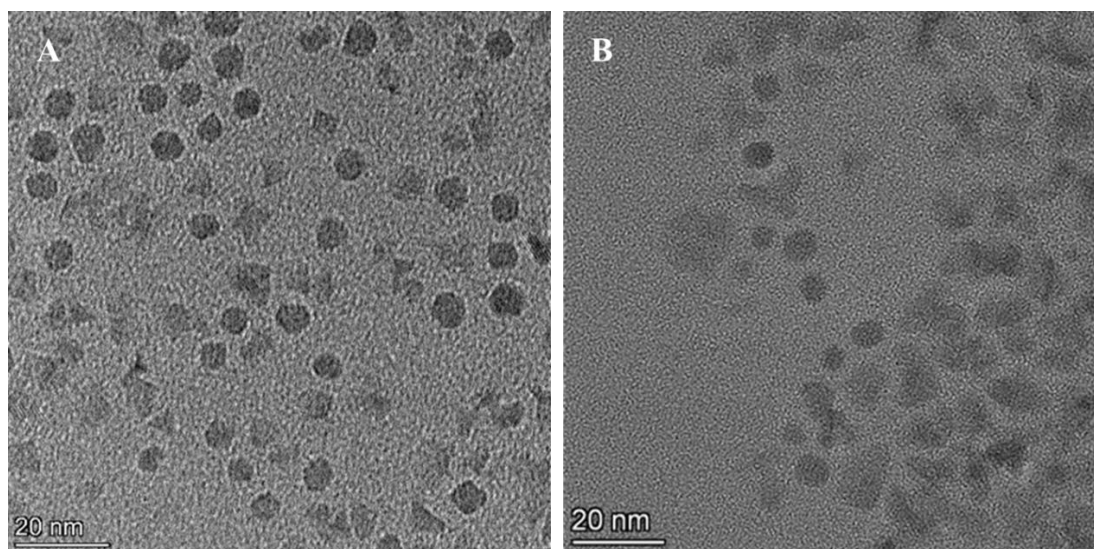

**Figure S1.** TEM images of (A) InP/ZnSe/ZnS-thin and (B) InP/ZnSe/ZnS-thick QDs.

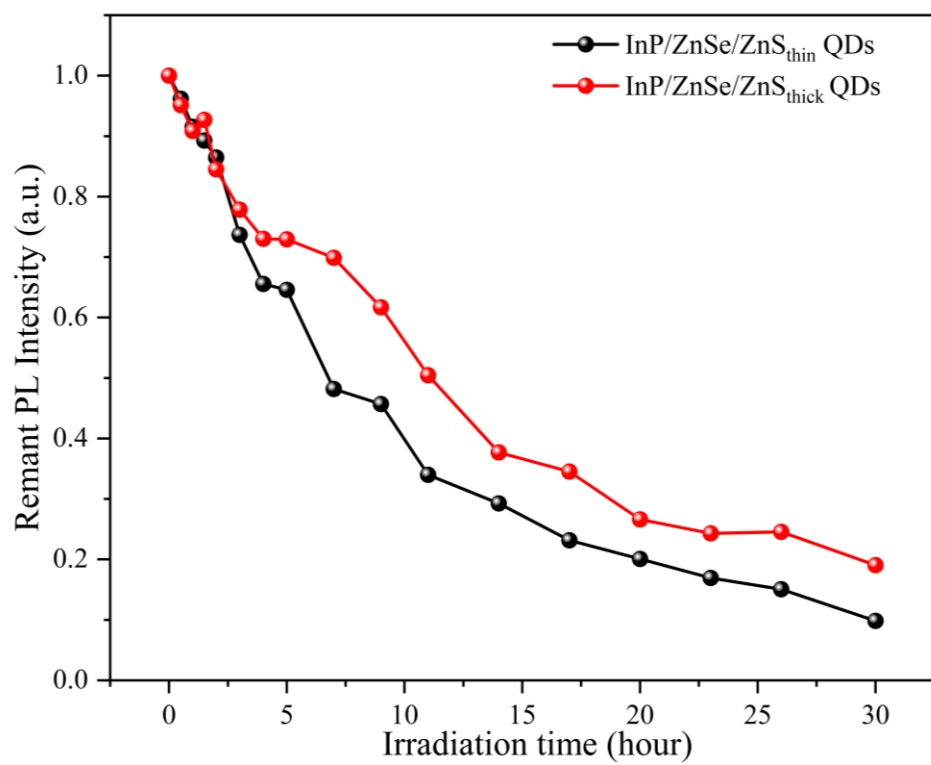

**Figure S2.** The PL intensity of InP/ZnSe/ZnS-thin QDs and InP/ZnSe/ZnS-thick QDs under the irradiation of LED at 450 nm and 3.0 W over time.

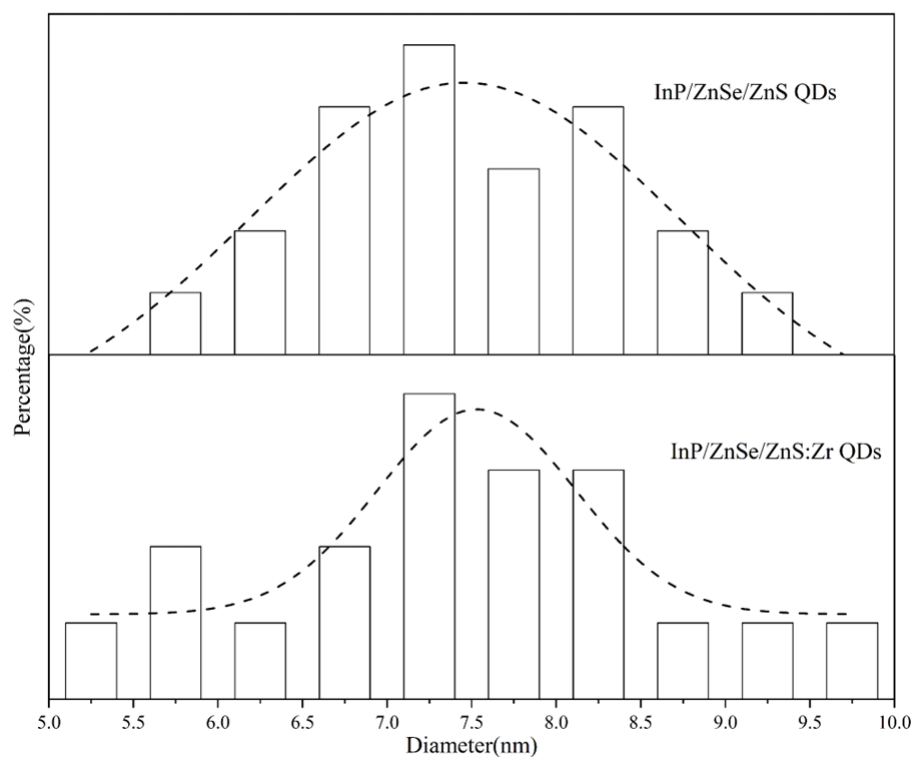

**Figure S3.** The size distribution of InP/ZnSe/ZnS and InP/ZnSe/ZnS:Zr (S/Zr=1:4) QDs.

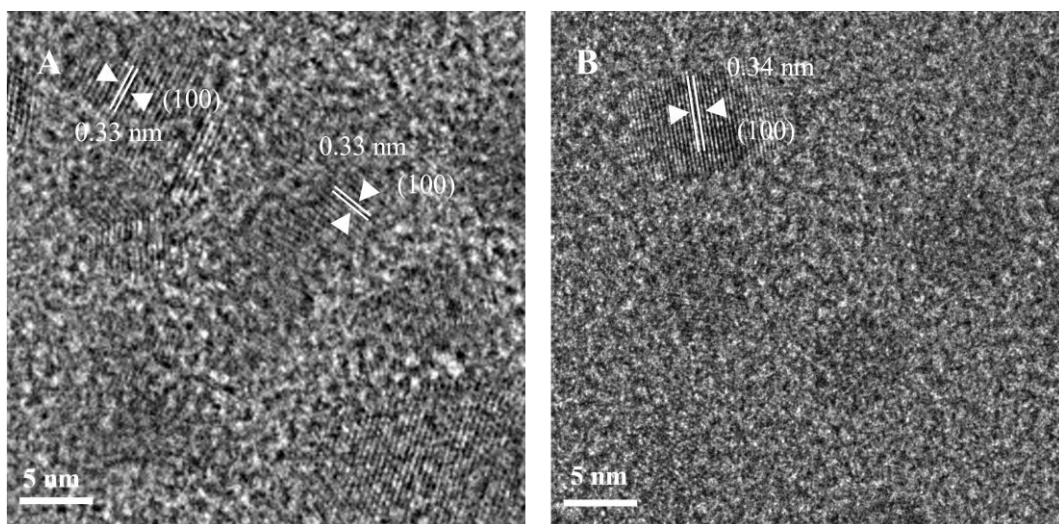

**Figure S4.** HRTEM images and lattice spacing of (A) InP/ZnSe/ZnS and (B) InP/ZnSe/ZnS:Zr (S/Zr=1:4) QDs.

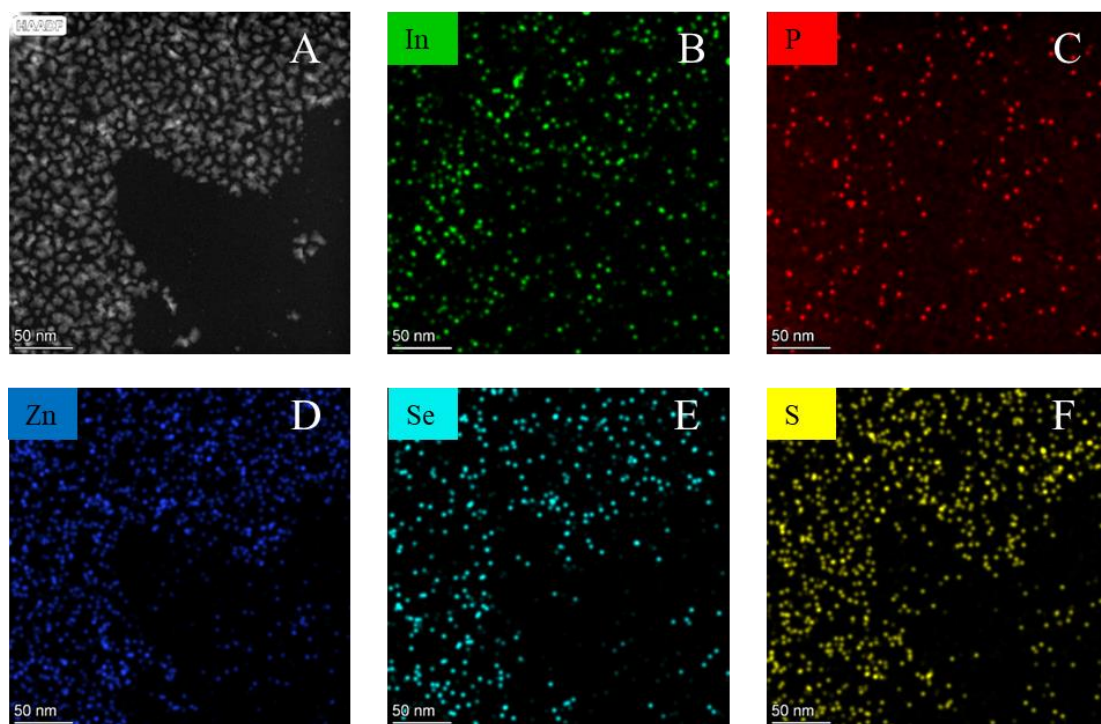

**Figure S5.** HAADF-STEM image and elemental maps of the In, P, Zn, Se, and S of InP/ZnSe/ZnS QDs.

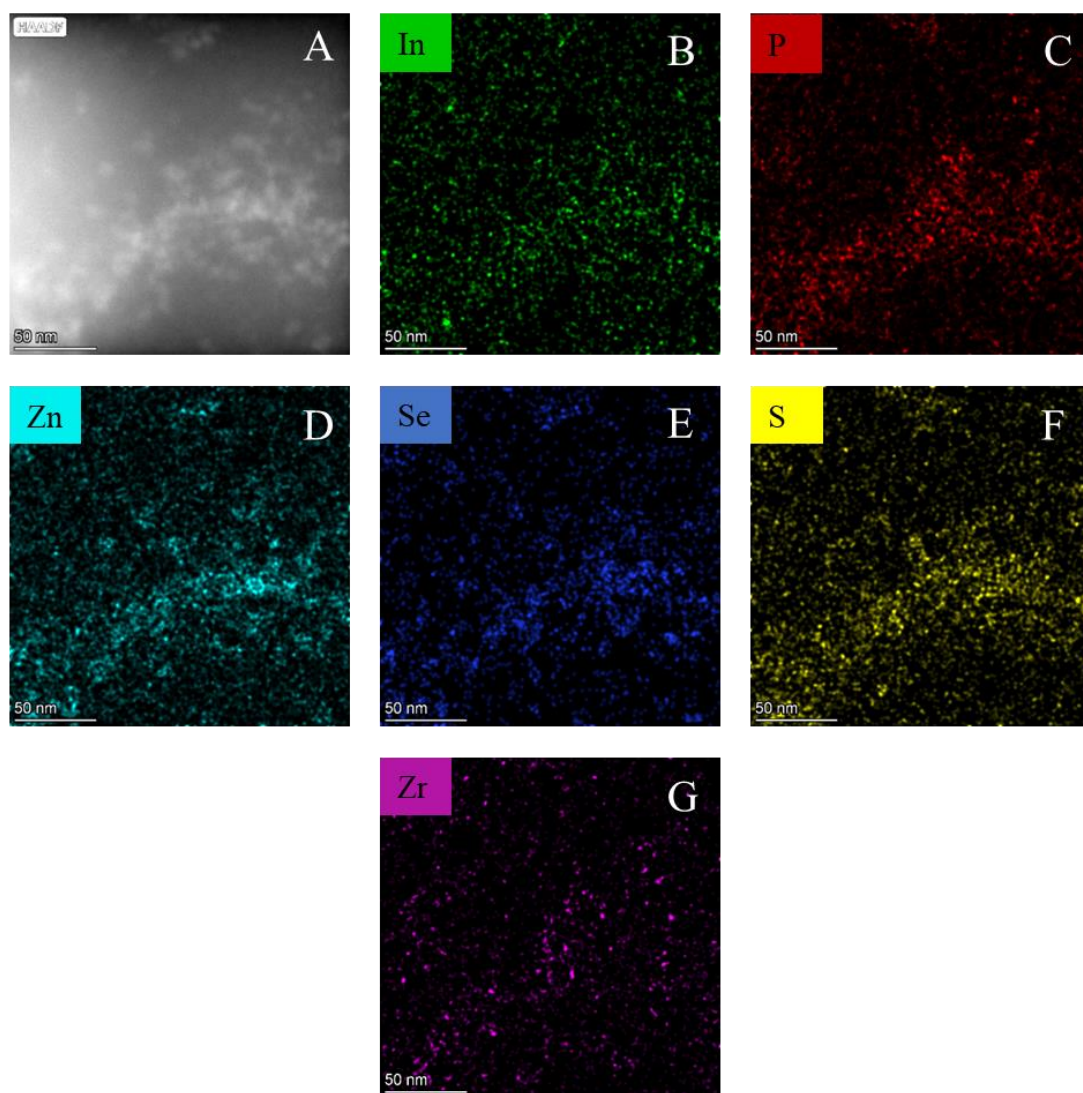

**Figure S6.** HAADF-STEM image and elemental maps of the In, P, Zn, Se, S, and Zr of InP/ZnSe/ZnS:Zr (S/Zr=1:4) QDs.

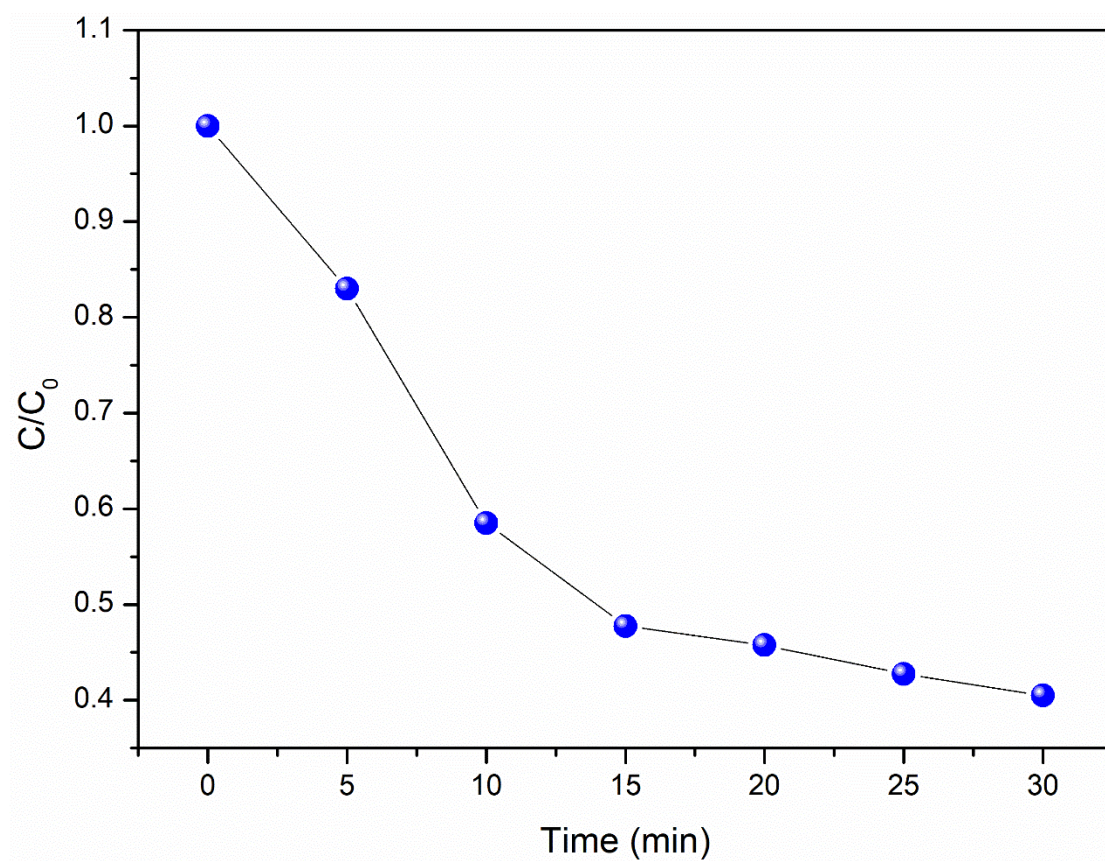

**Figure S7.** The reduction of Cr (VI) with InP/ZnSe/ZnS:Zr QDs treated under simulated sunlight irradiation.

**Table S1:** The position of PL peak and FWHM of InP/ZnSe/ZnS and InP/ZnSe/ZnS:Zr (with different Zr concentrations) QDs.

| S/Zr | Position of PL peak (nm) | FWHM (nm) |
|------|--------------------------|-----------|
| 1:0  | 604                      | 45.9      |
| 1:1  | 601                      | 44.2      |
| 1:2  | 600                      | 44.5      |
| 1:4  | 602                      | 44.7      |



**Table S2:** The EDX results of InP/ZnSe/ZnS:Zr QDs with the theoretical S: Zr molar ratios equaling 1:4.

| Sample   | Zn fraction (%) | Zr fraction (%) | Zn/Zr ratio |
|----------|-----------------|-----------------|-------------|
| Sample 1 | 39.23           | 18.25           | 2.15        |
| Sample 1 | 38.70           | 18.57           | 2.08        |
| Sample 1 | 35.41           | 14.68           | 2.41        |
| Average  | 37.78           | 17.17           | 2.20        |
